# Supplementary material for: Лингвокультурные особенности французских и русских сравнений-фразеологизмов с зооморфными характеристиками
Source: Royal Society of Chemistry journal article supplement (doi:10.1039/c2cp43365f), 2008-01-01
Supplement: c2cp43365f.pdf [file c2cp43365f.pdf]

## Supporting Information to:

### Localized plasmon resonances of bimetallic AgAuAg nanorods

Sung-Hyun Ahn,<sup>a#</sup> Deok-Soo Kim,<sup>a#</sup> Daeha Seo,<sup>b</sup> Won-Jun Choi,<sup>c</sup> Gi-Ra Yi,<sup>d</sup> Hyunjoon Song,<sup>b</sup>  
Q-Han Park,<sup>c</sup> and Zee Hwan Kim<sup>\*a</sup>

<sup>a</sup> Department of Chemistry, Korea University, Seoul 137-701, Korea

<sup>b</sup> Department of Chemistry, KAIST, Daejeon 305-701, Korea

<sup>c</sup> Department of Physics, Korea University, Seoul 137-701, Korea

<sup>d</sup> Department of Polymer Science and Engineering, Sungkyunkwan University, Gyeonggi 440-746,  
Korea

# Equal contributions

\*e-mail: [zhkim@korea.ac.kr](mailto:zhkim@korea.ac.kr)

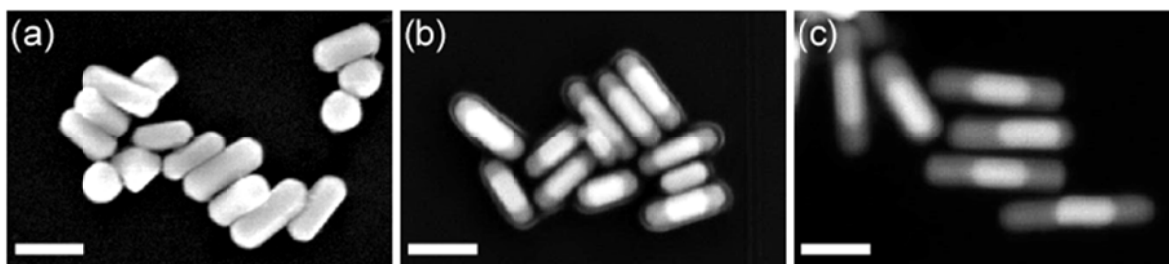

**Figure S-1:** Representative SEM images of nanorods used in the current work. (a) monolithic Au-NR with  $L_{\text{tot}} \sim 200$  nm; (b) AgAuAg-NR with  $L_{\text{tot}} \sim 200$  nm; (c) AgAuAg-NR with  $L_{\text{tot}} \sim 450 - 500$  nm. The scalebars in the images correspond to 200 nm. Typically, size dispersions of the monolithic and hetero-rods are about 10% of their means. See also the ref. 14 of the main text.
